# Goodness of fit checks for binomial N-mixture models

*Jonas Knape<sup>1#</sup>, Debora Arlt<sup>1</sup>, Frédéric Barraquand<sup>2</sup>, Åke Berg<sup>1</sup>, Mathieu Chevalier<sup>1</sup>, Tomas Pärt<sup>1</sup>, Alejandro Ruete<sup>1,3</sup>, Michał Zmihorski<sup>1</sup>*

<sup>1</sup>*Swedish University of Agricultural Sciences, <sup>2</sup>University of Bordeaux, <sup>3</sup>Greensway AB*

<sup>#</sup>*Department of Ecology, Box 7044, S-75007, Uppsala, Sweden, [jonas.knape@slu.se](mailto:jonas.knape@slu.se)*

## Abstract

1. Binomial N-mixture models are commonly applied to analyze population survey data. By estimating detection probabilities, N-mixture models aim at extracting information about abundances in terms of actual and not just relative numbers. This separation of detection probability and abundance relies on parametric assumptions about the distribution of individuals among sites and of detections of individuals among repeat visits to sites. Current methods for checking assumptions are limited, and their computational complexity have hindered evaluations of their performances.
2. We develop computationally efficient graphical goodness of fit checks and measures of overdispersion for binomial N-mixture models. These checks are illustrated in a case study, and evaluated in simulations under two scenarios. The two scenarios assume overdispersion in the abundance distribution via a negative binomial distribution or in the detection probability via a beta-binomial distribution. We evaluate the ability of the checks to detect lack of fit, and how lack of fit affects estimates of abundances.
3. The simulations show that if the parametric assumptions are incorrect there can be severe biases in estimated abundances: negatively if there is overdispersion in abundance relative to the fitted model and positively if there is overdispersion in detection. Our goodness of fit checks performed well in detecting lack of fit when the abundance distribution is overdispersed, but struggled to detect lack of fit when detections were overdispersed. We show that the inability to detect lack of fit due to overdispersed detection is caused by a fundamental similarity between N-mixture models with beta-binomial detections and N-mixture models with negative binomial abundances.
4. The strong biases in estimated abundances that can occur in the binomial N-mixture model when the distribution of individuals among sites, or the detection model, is mis-specified implies that checking goodness of fit is essential for sound inference in ecological studies that use these methods. To check

28 the assumptions we provide computationally efficient goodness of fit checks that are available in an  
29 R-package `nmixgof`. However, even when a binomial N-mixture model appears to fit the data well,  
30 estimates are not robust in the presence of overdispersion unless additional information about detection  
31 is collected.

## 32 1 Introduction

33 Count surveys are often conducted as parts of population monitoring programs and ecological studies to  
34 follow changes in abundance of organisms in the wild. N-mixture models (Royle 2004; Royle & Dorazio 2006)  
35 have become increasingly applied to data from count surveys to correct for imperfect detection and yield  
36 estimates of absolute abundances instead of just relative abundances. These models are intuitively appealing  
37 because they can be applied to data from surveys with simple as well as more complex field protocols and  
38 allow simultaneous inclusion of explanatory variables for both abundance and detection processes.

39 N-mixture models are hierarchical models composed of two layers where the first layer gives a statistical  
40 model for the distribution of individuals among sampled sites and the second layer a statistical model for the  
41 sampling or detection process. Binomial N-mixture models (Royle 2004) are a particular class of models that  
42 rely only on repeated counts from a large number of sites to estimate absolute abundance while accounting  
43 for imperfect detection using binomial detection models. The assumptions of these models include that  
44 the population size is the same at each repeat visit to the same site, usually called the closure assumption,  
45 and that each individual could potentially be detected at each visit; that the distribution of the number of  
46 animals at each site is randomly and independently distributed according to some parametric distribution;  
47 and that all individuals are detected independently. The simplicity of collecting data under the protocol of  
48 the binomial N-mixture model has led some authors to suggest monitoring programs to incorporate multiple  
49 visits to sites (Lyons *et al.* 2012), while others have advised careful scrutiny of model performance before  
50 adopting the binomial N-mixture model for inferences (Hunt *et al.* 2012; Couturier *et al.* 2013). In the  
51 remainder of the paper we will refer to binomial N-mixture models simply as ‘N-mixture models’.

52 Because N-mixture models rely on parametric distributions and other assumptions, it is vital for reliable  
53 inference to investigate how sensitive estimates are to deviations from assumptions, and to devise methods  
54 for checking any assumptions that the models are sensitive to. N-mixture models have been shown to be  
55 reasonably robust to individual heterogeneity in detection unless detection probabilities are small (Veech *et al.*  
56 2016), but to be sensitive to the closure assumption with overestimation of abundance when the assumption  
57 is violated (Toribio *et al.* 2012). Martin *et al.* (2011) showed through simulation that abundance was

58 severely overestimated with an N-mixture model when detection probabilities were varying randomly among  
59 visits according to a nearly uniform distribution. They associated such variation, causing overdispersion in  
60 detection relative to the binomial distribution, with correlated behaviour among animals. They suggested a  
61 beta-binomial detection model to deal with it.

62 Many applications of N-mixture models use a Poisson abundance mixture which leads to a restrictive variance-  
63 mean scaling such that the variances of counts as well as abundances are proportional to their respective  
64 means. However, overdispersion is a common feature of population count data (Hoef & Boveng 2007; Lindén  
65 & Mäntyniemi 2011) and Taylor's power law, with empirical as well as theoretical support, suggests that the  
66 variance-mean scaling of abundances follows a power law with an exponent typically somewhere between 1  
67 and 2 (Cohen *et al.* 2013). Other work has suggested that the abundance distributions found in population  
68 surveys can be highly complex and irregular, effectively defying parametric modelling altogether (Dorazio  
69 *et al.* 2008; Canale & Prünster 2017). Abundance overdispersion is sometimes incorporated in N-mixture  
70 models by assuming a zero inflated Poisson, negative binomial or Poisson log-normal abundance mixture.  
71 Several studies have found estimates from N-mixture models applied to survey data to depend on which  
72 abundance mixture is used (Kéry *et al.* 2005; Joseph *et al.* 2009) and that estimates from models (Royle  
73 2004) with a negative binomial abundance mixture sometimes behave poorly, yielding infinite maximum  
74 likelihood estimates of abundance (Dennis *et al.* 2015). This has led to recommendations for using zero  
75 inflated Poisson mixtures instead of negative binomial mixtures, even if the latter provide a better model  
76 fit (Joseph *et al.* 2009; Kéry & Royle 2016). Seemingly more realistic estimates do however not necessarily  
77 translate into better inference as the use of an ill fitting model could result in misleading conclusions.

78 In relation to their common usage relatively few studies have examined the performance of N-mixture models  
79 (Dennis *et al.* 2015), and calls have been made for evaluating and developing methods for assessing their  
80 fit (Kéry & Royle 2016; Knape & Körner-Nievergelt 2016). Our aim in this paper is to propose a set of  
81 tools, including graphical checks and overdispersion measures, to assess goodness of fit of N-mixture models,  
82 and to evaluate their ability in detecting lack of fit when there is overdispersion in abundance or detection  
83 relative to the fitted model. The graphical checks are based on randomized quantile residuals (Dunn & Smyth  
84 1996; Warton *et al.* 2016), which have recently been applied to check goodness of fit of occupancy models  
85 (Warton *et al.* 2017), while the overdispersion measures are defined through two types of chi-square statistics.  
86 Compared to previously suggested goodness of fit checks that require parametric bootstrapping (Kéry *et al.*  
87 2005) and are time consuming, the new checks are computationally efficient, making it possible to assess  
88 their performance through simulations. We demonstrate the goodness of fit checks in a case study of wetland  
89 birds, and assess them in two simulation scenarios with overdispersion in the abundance distribution and in

90 the detection model. The goodness of fit checks are available in an R-package `nmixgof`.

## 91 2 Methods

92 In this section we first introduce the basics of the N-mixture model. In section 2.2 we then develop graphical  
93 methods and overdispersion metrics for assessing the fit of N-mixture models. In section 2.3 we demonstrate  
94 the use of the goodness of fit checks in a case study on wetland birds in Sweden. Finally, in section 2.4 we  
95 investigate the sensitivity of N-mixture models to overdispersion in the abundance and detection models and  
96 the ability of the goodness of fit checks to detect violation of the distributional assumptions.

### 97 2.1 N-mixture models

98 N-mixture models are a suite of models for abundance data obtained from repeat count surveys at multiple  
99 sites (Royle 2004). They model the data as arising from an abundance process describing the spatial variation  
100 in the number of individuals among sites and a detection process describing how many of the individuals  
101 present at each site are found at each visit. Data come from a set of  $R$  different sites and for the abundance  
102 process it is assumed that the numbers of individuals at sites,  $N_i$ , are distributed according to some discrete  
103 statistical distribution with probability function  $g$ ,

$$N_i \sim g(N; \lambda_i, \theta),$$

104 where the draw for each site is independent,  $\lambda_i$  is describing the mean abundance in site  $i$  which can be  
105 a function of covariates, and  $\theta$  is an optional parameter for overdispersion in the abundance distribution.  
106 In most applications,  $g$  is modelled as either a Poisson, a zero-inflated Poisson (ZIP), or as a negative  
107 binomial distribution. We will focus on these three mixtures in this paper. For the ZIP mixture we use the  
108 parameterisation:

$$N_i \sim \begin{cases} 0 & \text{with probability } \psi \\ \text{Poisson}(\lambda_i) & \text{with probability } 1 - \psi \end{cases}$$

109 where  $\psi$  is the probability of an excess zero. For the negative binomial mixture we use the parameterisation:

$$N_i \sim \text{NegBin}(\lambda_i, \theta)$$

110 such that the variance of  $N_i$  is  $V(N_i) = \lambda_i + \theta\lambda_i^2$ .

111 For each site observations come in the form of  $T$  counts,  $y_{i1}, \dots, y_{iT}$ , and for the detection model it is assumed  
112 that the counts are independent binomial draws with population size as index (Royle 2004):

$$y_{it} \sim \text{Bin}(N_i, p_{it}).$$

113 where  $p_{it}$  is the detection probability associated with finding an individual that is present at site  $i$  at visit  
114  $t$  and which may vary according to site or visit specific covariates. The design idea underlying this model  
115 is that counts are conducted during repeat visits to each site during a period of time for which the local  
116 abundance is closed so that at each visit all individuals are present but only a fraction is detected.

117 Sometimes additional variation in detection is allowed for by letting

$$y_{it} \sim \text{Bin}(N_i, p'_{it})$$

118 where the  $p'_{it}$  are independently distributed according to a beta distribution

$$p'_{it} \sim \text{Beta}\left(p_{it} \frac{1 - \delta^2}{\delta^2}, (1 - p_{it}) \frac{1 - \delta^2}{\delta^2}\right)$$

119 resulting in a beta-binomial detection model. The specific parameterisation in the above equation ensures  
120 that  $p_{it}$  is the mean detection probability and that the standard deviation of  $p'_{it}$  scales linearly with  $\delta$  and is  
121 equal to  $\delta \sqrt{p_{it}(1 - p_{it})}$ , with  $0 \leq \delta \leq 1$ .

## 122 2.2 Checking for over-dispersion and goodness of fit

123 N-mixture models rely on several crucial assumptions that include population closure within sites at repeat  
124 visits (i.e. that the population size  $N$  remains the same across visits), specific parametric distributions for the  
125 detection process and the distribution of abundance as well as functional assumptions about covariate effects.

126 Checking the fit and assumptions of hierarchical models is difficult in general because distributional and  
127 independence assumptions occur at multiple levels in the hierarchy, and through conditioning on unobserved  
128 stochastic variables. Current common practice for assessing goodness of fit of N-mixture models, if checked  
129 at all, is to use parametric bootstrapping in combination with some goodness of fit statistic, often sums  
130 of squares or a Freeman-Tukey statistic (Kéry & Royle 2016). This approach is computationally intensive  
131 since in each bootstrap sample the model under investigation needs to be fitted to simulated data a large  
132 number of times. In this section we suggest three types of residuals to check the goodness of fit of N-mixture

133 models, as well as two measures of overdispersion relative to a fitted model. The benefit of these over the  
134 bootstrap procedure is that i) they are orders of magnitude faster to compute, with computing time measured  
135 in terms of seconds rather than hours as is sometimes the case for the parametric bootstrap procedure, and ii)  
136 residuals can be used to graphically check a range of assumptions such as overdispersion via quantile-quantile  
137 plots (qq plots), residual plots against fitted values to check homoscedasticity, and plots of residuals against  
138 covariates to check functional assumptions (Warton *et al.* 2017).

### 139 **2.2.1 Randomized-quantile residuals**

140 We will define three types of randomized-quantile (rq), or Dunn-Smyth, residuals (Dunn & Smyth 1996). Rq  
141 residuals have recently gained popularity in ecological analyses (Warton *et al.* 2016) due to their convenient  
142 property that they are normally distributed under the correct model. For sparse count data this means that  
143 plots of e.g. residuals against fitted values behave in similar ways to such plots for ordinary linear models  
144 which is not the case for standard residuals for count data. That the residuals are indeed normally distributed  
145 is also easy to check, for example using qq plots (Warton *et al.* 2016).

146 The normality of rq residuals is achieved by randomization: For a random count variable  $z$  with cumulative  
147 distribution function (CDF)  $F$ , they are defined by

$$\begin{aligned} r_{rq} &= \Phi^{-1}(u) \\ u &\sim \text{Unif}(F(z-1), F(z)) \end{aligned} \tag{1}$$

148 where  $\Phi^{-1}$  is the inverse of the standard normal CDF and  $u$  is a value randomly generated from a uniform  
149 distribution. To compute rq residuals the function  $F$  needs to be computed and below we define three variants  
150 of rq residuals using CDFs corresponding to different aspects of the data and potentially picking up different  
151 aspects of model fit.

#### 152 **2.2.1.1 Marginal rq residuals**

153 For the first type of rq residuals we simply take  $F$  to be the marginal distribution of the counts (i.e. the  
154 distribution of the counts over all possible latent abundances). For the N-mixture model without heterogeneity  
155 in  $p_{it}$  and with a Poisson, ZIP or negative binomial mixture distribution, the marginal distribution of each  
156 observation comes from the same type of distribution as that used for the abundance mixture. If for example

157 the abundance mixture is  $ZIP(\lambda_i, \psi)$ , the marginal distribution of each  $y_{it}$  is  $ZIP(p_{it}\lambda_i, \psi)$ . In these cases  
 158 the randomized-quantile residuals can be easily computed using the definition above (eq. 1).

159 For beta-binomial detection models the marginal distribution is to our knowledge not available in closed form  
 160 but can be computed by numeric summation over  $N$  using

$$F(y_{it}) \approx \sum_{N=y_{it}}^K F_{BetaBin}(y_{it}; N, p_{it}, \delta) P_i(N)$$

161 where  $K$  is large enough that the contribution from larger  $N$  can be ignored,  $F_{BetaBin}$  is the CDF of the  
 162 beta-binomial, and  $P_i(N)$  is the probability that the abundance at site  $i$  is equal to  $N$  given by the abundance  
 163 distribution. This is similar to how the likelihood of the N-mixture model can be approximated by a finite  
 164 sum (Royle 2004).

165 A property of the marginal rq residuals computed from an N-mixture model is that residuals from the same  
 166 site are not independent because the counts are not. Hence they should not be used directly in qq plots  
 167 which assume independent observations. However sets of residuals containing only one residual from each site  
 168 are independent in the same way that sets of counts are, and separate qq plots can be drawn for each set.  
 169 Since there is one marginal rq residual per observation, they can be plotted against visit specific detection  
 170 covariates as well as against site specific covariates.

### 171 2.2.1.2 Site-sum rq residuals

172 The second type of residuals we propose is defined from the marginal distribution of the sum of the counts  
 173 within each site  $y_{Si} = \sum_t y_{it}$ . The marginal CDF for the site sums can be computed numerically using

$$F(y_{Si}) \approx \sum_{N=y_{Si}}^K F_{BinSum}(y_{Si}; N, p_{i1}, \dots, p_{iT}) P_i(N)$$

174 where  $F_{BinSum}$  is the CDF of a sum of independent binomial variables, all with the same index  $N$  but  
 175 potentially different probabilities  $p_{it}$ . If the  $p_{it}$  are all the same  $F_{BinSum}$  is simply the cumulative probability  
 176 function of a binomial distribution with index  $TN$  but if the  $p_{it}$  are not all identical then  $F_{BinSum}$  is more  
 177 complex. In the general case it can be computed by brute force as a numeric sum:

$$F_{BinSum}(y_{Si}; N, p_{i1}, \dots, p_{iT}) = \sum_{k_1 + \dots + k_T \leq y_{Si}} P_{Bin}(k_1; N, p_{i1}) \cdot \dots \cdot P_{Bin}(k_T; N, p_{iT})$$

178 where  $P_{Bin}$  is the probability function of the Binomial distribution. The same computation may be used for

179 beta-binomial detection models by replacing  $P_{Bin}$  with  $P_{BetaBin}$ .

180 The idea of aggregating counts across sites is to make the residuals independent and to potentially increase  
181 their informativeness in cases where counts are sparse. Since there is one site-sum residual per site, they can  
182 be used in plots against site-specific covariates.

### 183 2.2.1.3 Observation rq residuals

184 We also explored a third type of residuals that we refer to as observation residuals. The idea is to compute  
185 residuals from the observation model only by conditioning on the abundances, with the intent of more  
186 specifically checking the detection part of the model. Since the abundances are not directly available from a  
187 fitted model we use a random sample of abundances from the empirical Bayes distribution (the distribution  
188 of the abundances given the data and under the parameters obtained by maximum likelihood) for the  
189 conditioning. That is, residuals were computed using the binomial or beta-binomial CDF with  $N_i$  equal to a  
190 draw from the empirical Bayes distribution. The random draw introduces additional stochasticity to the  
191 residuals which is likely to reduce their power to some degree.

## 192 2.2.2 Measures of overdispersion

193 The parametric bootstrap procedure used to check goodness of fit mentioned above has also been used to  
194 provide a measure of overdispersion (Kéry & Royle 2016) through

$$\hat{c} = \chi_{od}^2 / \bar{\chi}_{od,sim}^2 \quad (2)$$

195 where  $\chi_{od}^2$  is a goodness of fit statistic computed from a model fit to the data and  $\bar{\chi}_{od,sim}^2$  is the mean of  
196 the same statistic computed from fits of the model to data simulated from the model using parameters  
197 estimated from the original data. Under the correct model the expectation of  $\hat{c}$  is 1 while we would expect  $\hat{c}$   
198 to be greater than 1 if the data are over-dispersed relative to the fitted model (and less than 1 if they are  
199 under-dispersed). Clearly this is a computationally expensive calculation and thereby difficult to evaluate  
200 through simulations. The goal in this section is to find similar measures with less of a computational burden,  
201 and whose behaviour we will explore in simulations in a later section.

202 For measures of discrepancy between the observed data and a fitted model we use chi-square type statistics  
203 based on Pearson residuals which have the form (Hilbe 2011):



$$\chi^2 = \sum \frac{(O - E)^2}{V} \quad (3)$$

204 where  $V$  is the variance of the observations  $O$  and  $E$  is its expectation. The statistic differs from the standard  
205 chi-square statistic which has the form

$$\chi^2 = \sum \frac{(O - E)^2}{E}.$$

206 The former collapses to the latter when the variance is equal to the mean, such as when  $O$  are counts from  
207 a Poisson distribution with mean  $E$ . The statistic based on Pearson residuals has the advantage that the  
208 expectation of the terms in the sum are 1 under the correct model which is not the case for the standard  
209 chi-square statistic in general (e.g. under a negative binomial model). We will use this feature here to  
210 define overdispersion metrics that have mean 1 under the correct model. We will consider two variants of  
211 overdispersion measures, one based on marginal Pearson residuals and the other based on site-sum Pearson  
212 residuals.

### 213 2.2.2.1 Marginal $\hat{c}$

214 For the marginal measure of overdispersion we use the chi-square statistic based on Pearson residuals (eq. 3)  
215 computed over each observation:

$$\chi_M^2 = \sum_{i,t} \frac{(y_{it} - E(y_{it}))^2}{V(y_{it})} = \sum_{i,t} \frac{(y_{it} - p_{it}E(N_i))^2}{V(y_{it})}.$$

216 The general expression for the variance of the counts with beta-binomial detection is

$$V(y_{it}) = p_{it}(1 - p_{it})[E(N_i) + \delta^2\{E(N_i)^2 - E(N_i) + V(N_i)\}] + p_{it}^2V(N_i)$$

217 where  $E(N_i)$  and  $V(N_i)$  are the mean and variance given by the abundance mixture (a derivation of this formula  
218 is given in Appendix 1). For the simplest case with Poisson distributed abundances ( $E(N_i) = V(N_i) = \lambda_i$ )  
219 and binomial detection ( $\delta = 0$ ) the variance reduces to

$$V(y_{it}) = \lambda_i p_{it}(1 - p_{it}) + p_{it}^2 \lambda_i.$$

220 From  $\chi_M^2$  we define the marginal overdispersion measure as

$$\hat{c}_M = \chi_M^2 / (RT - n_p)$$

221 where  $n_p$  is the number of parameters of the model and  $RT$  is the product of the number of sites and the  
222 number of visits, i.e. the total number of counts.

### 223 **2.2.2.2 Site-sum $\hat{c}$**

224 We define the site-sum measure of overdispersion by computing the chi square statistic (eq. 3) for Pearson  
225 residuals of the summed counts across sites:

$$\chi_S^2 = \sum_i \frac{(y_{Si} - E(y_{Si}))^2}{V(y_{Si})} = \sum_i \frac{(y_{Si} - \sum_t p_{it} E(N_i))^2}{V(y_{Si})}.$$

226 The variance of the summed counts in the above equation is

$$V(y_{Si}) = \sum_j V(y_{it}) + \sum_{t_1 \neq t_2} p_{it_1} p_{it_2} V(N_i)$$

227 From this we define the site-sum measure of overdispersion by again dividing by the number of terms in the  
228 sum ( $R$ ) less the number of parameters ( $n_p$ ):

$$\hat{c}_S = \chi_S^2 / (R - n_p).$$

## 229 **2.3 Case study: Northern shoveler**

230 To illustrate the performance of the residuals and overdispersion metrics above, we analyse data from a  
231 wetland survey conducted in May and June of 2016 at 50 wetland sites across southern Sweden. Most sites  
232 (90%) were visited 10 times during a three week period, split between 5 visits by each of two observers,  
233 but some sites had fewer visits. The number of individuals for each of 70 bird species associated with  
234 wetlands was recorded on each visit. Here, we use counts for Northern shoveler (Fig. S1), a dabbling duck  
235 moderately common in lakes and wetlands in southern Sweden. We fit six N-mixture models to the data using  
236 combinations of Poisson (P), ZIP and negative binomial (NB) abundance mixtures and binomial (B) and  
237 beta-binomial (BB) detection. Hereafter the models will sometimes be referred to using abbreviations such as  
238 BB-ZIP with prefix denoting the detection model and suffix denoting the abundance distribution. All models

239 included two covariates for abundance, the log transformed total area of water at the wetland representing  
240 its size and the latitude of the wetland, and two covariates for detection, the date of the survey and the  
241 percentage of reed cover at the wetland as a proxy for visibility. All covariates were introduced as linear  
242 functions on the log (abundance) and logit scale (detection) and were standardized to mean 0 and standard  
243 deviation 1 prior to analyses. We fitted models with binomial detection using the R-package unmarked (Fiske  
244 & Chandler 2011) and models with beta-binomial detection using custom code.

245 The N-mixture model as implemented in unmarked approximates the likelihood by truncating an infinite sum  
246 over all possible values of  $N$ . The upper bound,  $K$ , needs to be set when fitting the model, but it is known  
247 that estimates can be unstable to changes in this bound, possibly due to maximum likelihood estimates of  
248 abundance being infinite (Dennis *et al.* 2015). We used a numeric upper bound  $K = 400$  for abundance in  
249 the calculation of the likelihoods but also fitted the same models a second time using  $K = 1000$  to check if  
250 the estimates were stable to this numeric cutoff.

### 251 **2.3.1 Results of case study**

252 Estimates under the Poisson and ZIP abundance mixtures were not sensitive to the numerical cutoff  $K$  while  
253 this was the case for both models with an NB mixture. The estimates obtained for the NB mixtures are thus  
254 not maximum likelihood estimates, and estimates of abundance will increase and those of detection decrease  
255 as  $K$  is increased. We will refer to them as truncated estimates. Models with binomial and beta-binomial  
256 detection give similar estimates under the same abundance mixture but the estimates differ among abundance  
257 mixtures (Fig. 1).

258 Qq plots of site-sum randomized quantile residuals show that models with Poisson or ZIP mixtures provide  
259 poor fits to the data since the quantiles deviate clearly from the identity line (Fig. 2), while the truncated  
260 estimates of the NB mixtures appear adequate (Fig. 2). The qq plots for the Poisson mixtures indicate that  
261 the largest residuals are larger and the smallest smaller than would be expected under Poisson mixtures  
262 while the qq plots for the ZIP mixtures show some improvement in terms of explaining the smallest (zero)  
263 observations, but is still at loss in explaining larger counts. Similar patterns are seen for the marginal rq  
264 residuals (Fig. S2). The  $\hat{c}$  measures similarly indicate substantial overdispersion ( $\hat{c} \gg 1$ ) for the Poisson  
265 and ZIP mixtures but not for the truncated NB estimates (Table 1). Overdispersion is stronger according to  
266  $\hat{c}_M$  than  $\hat{c}_S$  (Table 1). Similarly, AIC values indicate a poor fit of the Poisson and ZIP mixtures relative to  
267 the truncated NB mixture estimates (Table 1). AIC in addition suggest a poor fit of the truncated B-NB  
268 model relative to the truncated BB-NB model which is not picked up by the qq plots of site-sum residuals or

269  $\hat{c}_S$ . Qq plots of observation residuals however do suggest lack of fit of the truncated B-NB model (Fig. 3).

270 Qq plots of observation residuals for the truncated BB-NB model show no obvious lack of fit (Fig. 3).

| model  | $\hat{c}_S$ | $\hat{c}_M$ | AIC    |
|--------|-------------|-------------|--------|
| B-P    | 11.0        | 5.3         | 2026.3 |
| B-ZIP  | 4.4         | 3.3         | 1915.6 |
| B-NB   | 0.9         | 1.3         | 1601.6 |
| BB-P   | 9.2         | 2.9         | 1789.5 |
| BB-ZIP | 4.6         | 2.2         | 1719.8 |
| BB-NB  | 0.9         | 0.8         | 1568.3 |

Table 1: Estimates of overdispersion for fits to Northern shoveler data.

271 These results leave us in a quandary. The NB mixtures give unstable estimates and cannot be used for  
272 inferences about abundance, and the poor fit of the Poisson and ZIP mixtures suggest that we cannot use  
273 estimates from these models for reliable inference either. To check if the reason for the poor fit of the Poisson  
274 and ZIP mixtures might be due to incorrect functional covariate relationships we plot rq residuals against  
275 each of the covariates for the BB-ZIP model, which has the best fit among the models with stable estimates  
276 (Fig. S3). Since there is no clear pattern in the residuals as a function of covariates for this model there  
277 appears to be no simple correction to improve its fit. The conclusion from this case study therefore has to be  
278 that we are not able to find an adequately fitting N-mixture model that provides reasonable estimates for the  
279 data at hand. The seemingly decent fit using the truncated estimates from the NB mixtures on the other  
280 hand suggest that an analysis of relative abundances with generalized linear mixed models accounting for  
281 overdispersion could be fruitful (Barker *et al.* 2017), but we do not pursue this further here.

## 282 2.4 Simulations

283 To investigate the properties of our goodness of fit checks, and how they relate to potential bias in parameter  
284 estimates, we ran two simulation scenarios, one where there is overdispersion in the abundance distribution  
285 relative to the Poisson distribution and one where there is overdispersion in detection relative to the binomial  
286 distribution such that detection probabilities vary independently among sites and visits.

### 287 2.4.1 Scenario 1: Overdispersed abundance

288 We simulated data over 200 sites, each visited 5 times, using a binomial detection model with  $p_{it}$  set to 0.25  
289 for all visits and sites and with a constant expected abundance across all sites  $\lambda_i = 10$ . To investigate effects  
290 of overdispersion we used a negative binomial abundance distribution and varied the overdispersion coefficient  
291  $\theta$  from 0 to 2 in steps of 0.25. Thus, data were generated using a B-NB model. For each value of  $\theta$  500 data

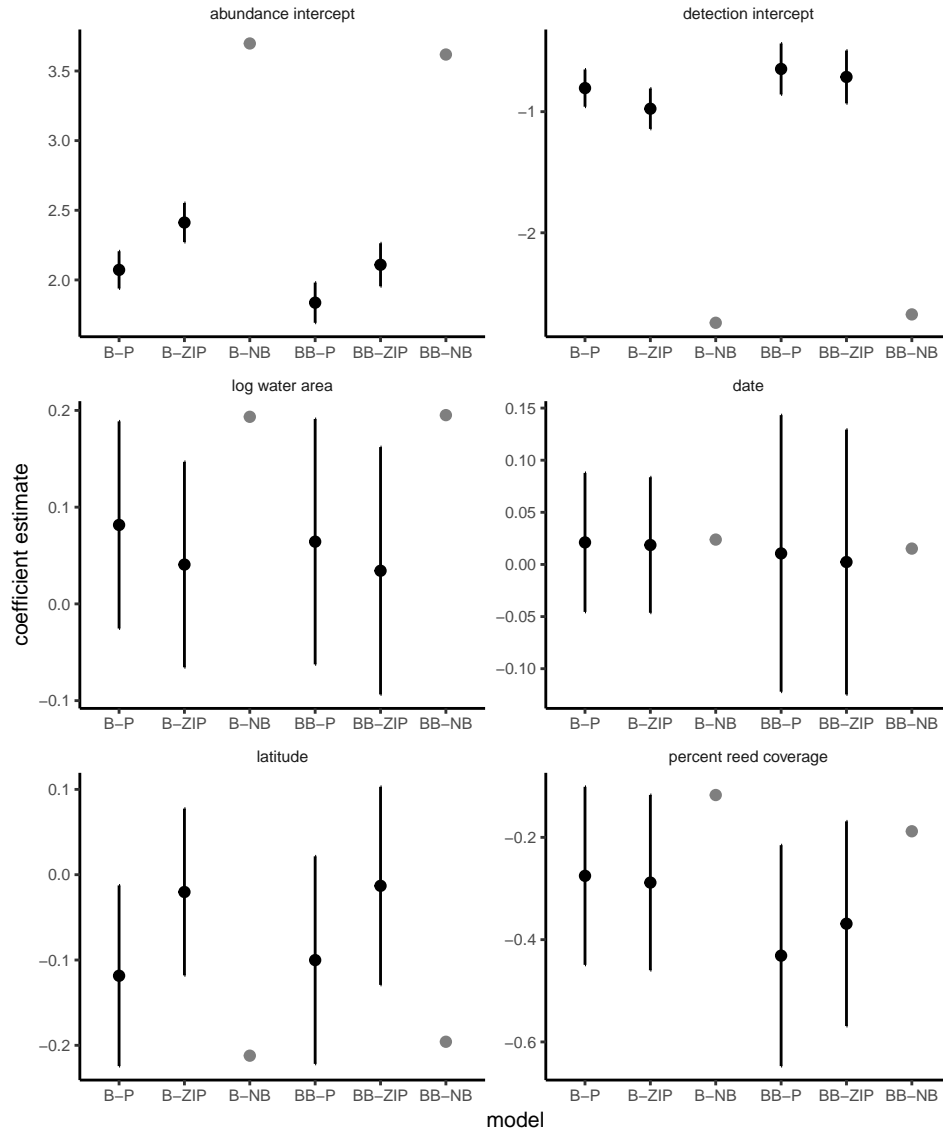

Figure 1: Estimates and 95% confidence intervals for intercepts and covariates coefficients for abundance (left panels) and detection (right panels) of the models fitted to Northern shoveler data. Prefix B and BB refers to, respectively binomial and beta-binomial detection models. Suffix P, ZIP and NB refers to Poisson, zero-inflated Poisson, and negative binomial abundance mixtures. Estimates under the NB mixtures are unstable and not maximum likelihood estimates. Truncated point estimates are given in gray for  $K=400$  for those models, but confidence intervals are omitted.

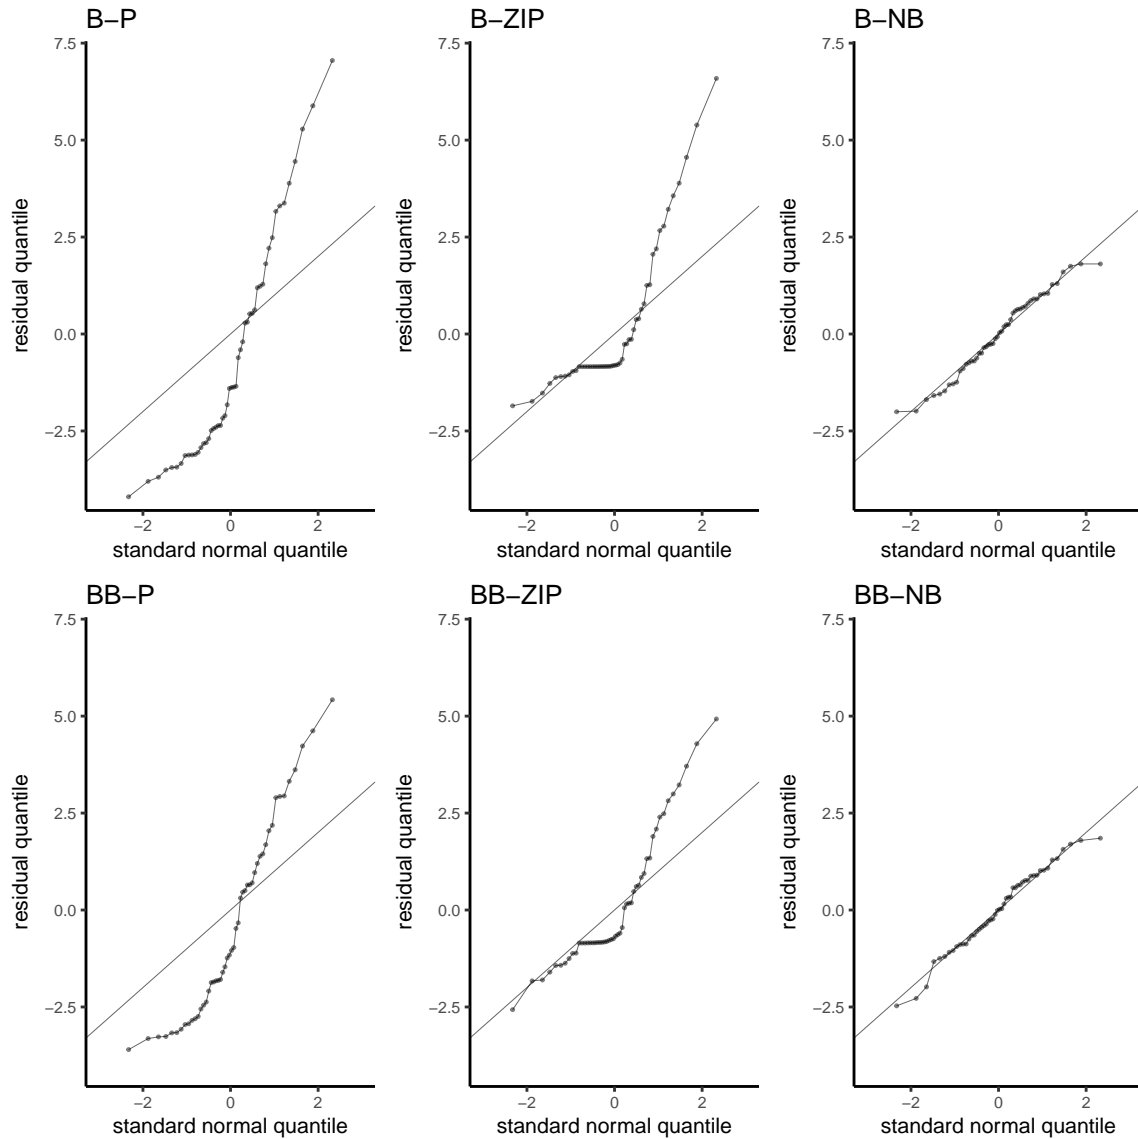

Figure 2: QQ plots of site-sum randomized-quantile residuals against standard normal residuals for fits of models to the Northern shoveler data. Under a good fit residuals should be close to the identity line (gray). Prefix B and BB refers to, respectively binomial and beta-binomial detection models. Suffix P, ZIP and NB refers to Poisson, zero-inflated Poisson, and negative binomial abundance mixtures.

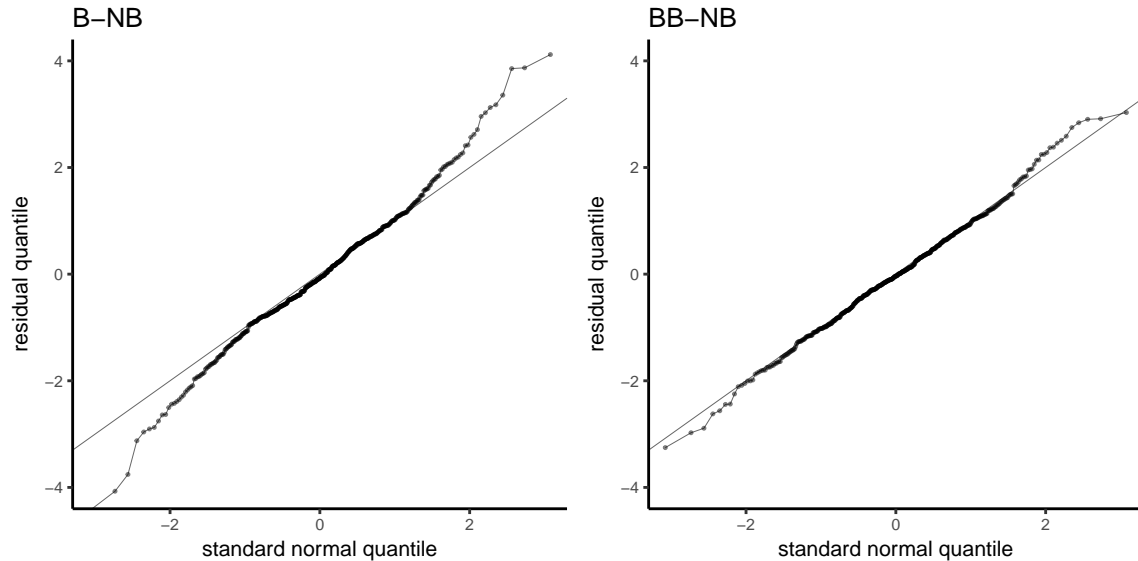

Figure 3: QQ plots of observation randomized quantile residuals against standard normal residuals for fits of binomial and beta-binomial NB models to the Northern shoveler data. Under a good fit residuals should be close to the identity line (gray). B and BB refers to, respectively binomial and beta-binomial detection models, while NB refers to the negative binomial abundance mixture.

292 sets were generated. For each simulated data set we fit a B-P, B-ZIP, B-NB (which in this simulation is the  
293 correct model), and a BB-P N-mixture model, each with a single intercept for detection and abundance but  
294 no covariates. The models with binomial detection (B-P, B-ZIP, and B-NB) were fitted in unmarked while  
295 the BB-P model was fitted using custom R-code.

296 In addition, we fitted a second set of models that were identical to the ones described above except for  
297 the addition of a single covariate for abundance. The covariate was generated from a standard normal  
298 distribution and was used in the fitted models but was unrelated to the simulated data. These three models  
299 with covariates were fitted in order to investigate if overdispersion might lead to finding spurious effects of  
300 covariates (Richards 2008).

301 We used a numeric cutoff value  $K = 200$  for the calculation of the likelihood during model fitting. To check  
302 for stability of estimates with respect to  $K$  we additionally fitted each model using a  $K$  value of 400 and  
303 classified estimates as stable if the abundance intercept between the two  $K$  values differed by less than 0.01.

304 For all the fitted models we retrieved parameter estimates, AIC, and also computed  $\hat{c}_M$  and  $\hat{c}_S$ . As a  
305 rough estimate of the power of the qq plots to detect non-normality in the randomized quantile residuals  
306 we computed the p-value from a Shapiro-Wilks test of normality for the site-sum and observation residuals  
307 (this was not done for the marginal residuals because they are not independent among visits). We do not  
308 recommend this procedure in applications but used it here to obtain a crude but objective measure of power

309 of the residuals to detect lack of fit. In applications we suggest using graphical checks via qq plots and plots  
310 of residuals against fitted values and covariates because such checks provide more information about the  
311 nature of the lack of fit than a p-value does.

#### 312 **2.4.2 Scenario 2: Overdispersed detection**

313 In the second scenario we explored the effects of overdispersion in detection relative to the binomial distribution.  
314 The setup in this scenario is similar to the setup in scenario 1, except that we used a Poisson abundance  
315 mixture and a beta-binomial detection model to simulate data (i.e. a BB-P model). We varied  $\delta$ , i.e. the  
316 amount of variation in the detection probability, from 0 to  $1/\sqrt{5}$ . The upper bound was chosen so that the  
317 distribution of the detection probability has an interior mode for all values of  $\delta$  except for  $\delta = 1/\sqrt{5}$  where  
318 the mode is at 0. We fitted the same models as in scenario 1.

#### 319 **2.4.3 Simulation results: scenario 1**

320 Nearly all model fits converged and were stable with respect to  $K$  in this scenario (Fig. 4a). As expected,  
321 fitting the true B-NB model provided the least bias, nearly nominal confidence interval coverage for the  
322 covariate effect,  $\hat{c}$  measures close to 1, and rejected the normality test for the rq residuals in proportion to  
323 the alpha level (Fig. 4).

324 The B-P, B-ZIP and BB-P models strongly underestimated abundance for high levels of overdispersion with  
325 a relative bias of less than -50% for the B-P, B-ZIP and BB-P models (Fig. 4c). The strongest bias was given  
326 by the BB-P model. These levels of bias are of similar magnitude to estimates not adjusted for detection,  
327 which had a relative bias of around -60%. Overdispersion also led to poor confidence interval coverage for the  
328 spurious covariate effect, except when fitting the correct model (Fig. 4d).

329 Lack of fit relative to the true B-NB model was readily identified by AIC in the simulations (Fig. 4b).  
330 Absolute lack of fit was similarly well identified by  $\hat{c}_M$  and  $\hat{c}_S$  but the latter estimates of overdispersion were  
331 higher (Fig. 4e and f). Considerable bias in the abundance estimates (more than 30%) was associated with  
332 average  $\hat{c}_M$  and  $\hat{c}_S$  as low as 1.5.

333 Normality tests of the site-sum rq residuals rejected incorrect models at high rates (Fig. 4g), but observation  
334 rq residuals had considerably lower power (Fig. 4h).



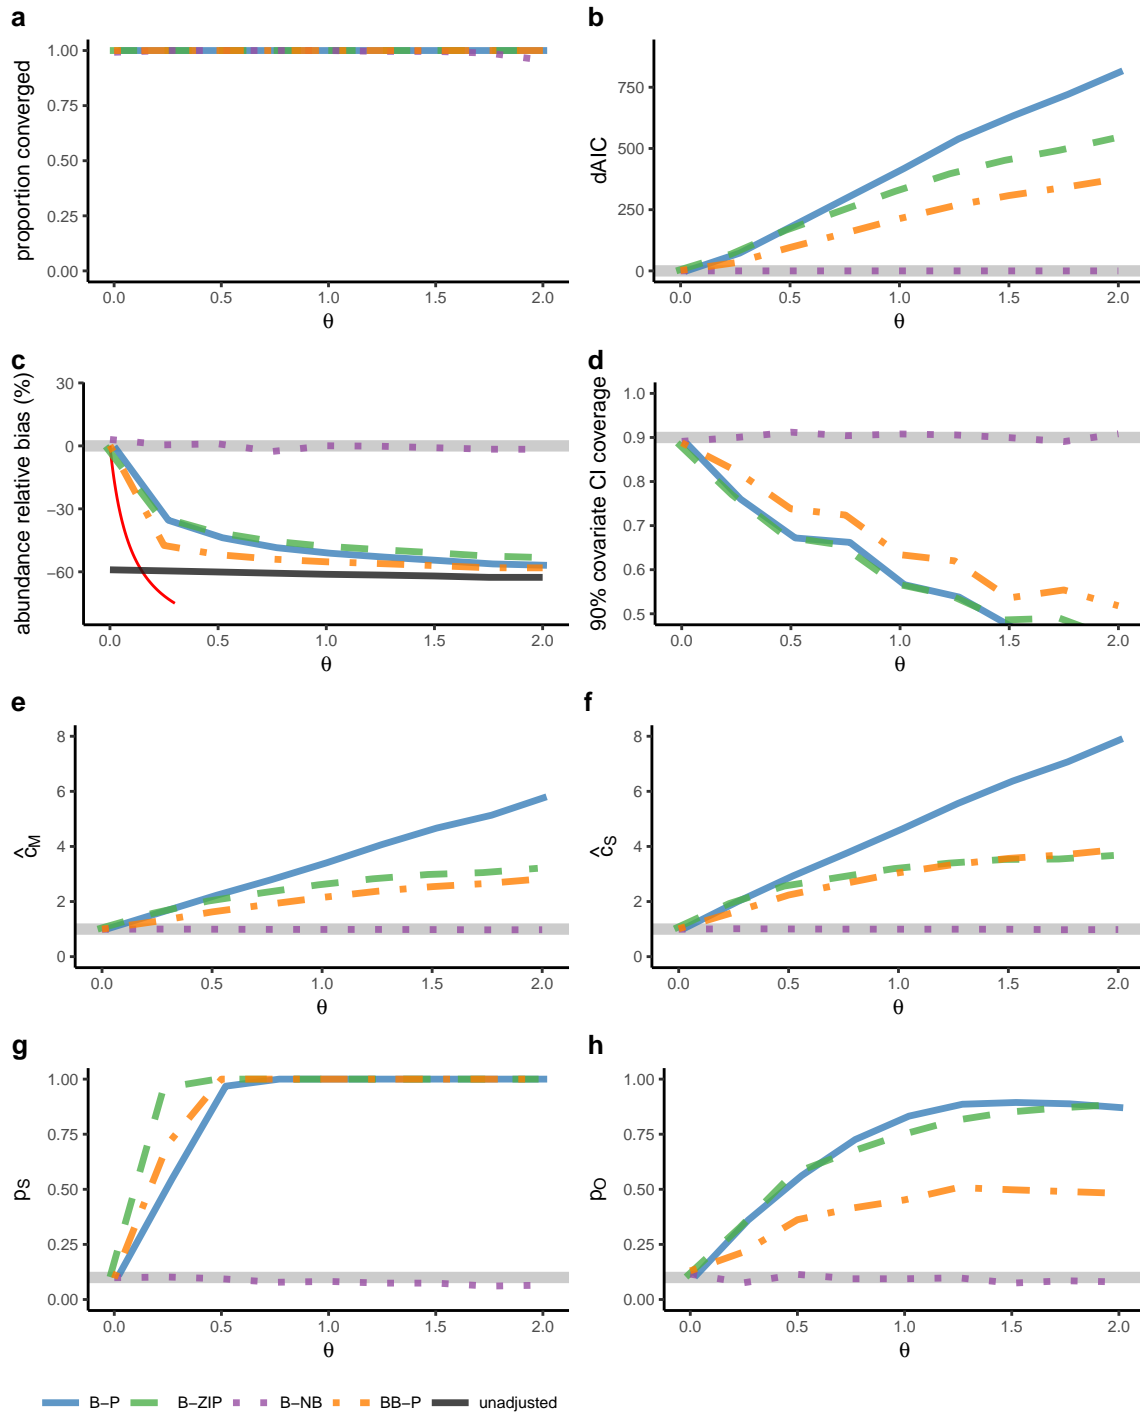

Figure 4: Results for binomial Poisson (B-P, blue), binomial ZIP (B-ZIP, green), binomial NB (B-NB, magenta), and beta-binomial Poisson (BB-P, orange) models fitted to data simulated from a negative binomial mixture with binomial detection (scenario 1) as a function of the overdispersion  $\theta$ . Grey lines give the reference level in each panel. a) Proportion of simulations for which estimates were stable relative to the numerical cutoff  $K$  and for which the optimization routine converged. b) Average difference in AIC between each model and the fitted correct B-NB model. c) Relative bias in estimated mean abundance. Black line gives estimates not adjusted for imperfect detection, computed as the mean of the maximum counts at each site. The red line gives the theoretical bias of the BB-P model by matching moments. d) Proportion of Wald confidence intervals (90%) for the covariate effect that cover the true value (0). e) Marginal overdispersion measure. f) Site-sum overdispersion measure. g) Proportion of simulations for which a normality test (Shapiro) computed from site-sum  $r_q$  residuals was rejected at the 10% level. h) Proportion of simulations for which a normality test (Shapiro) computed observation  $r_q$  residuals was<sup>17</sup> rejected at the 10% level.

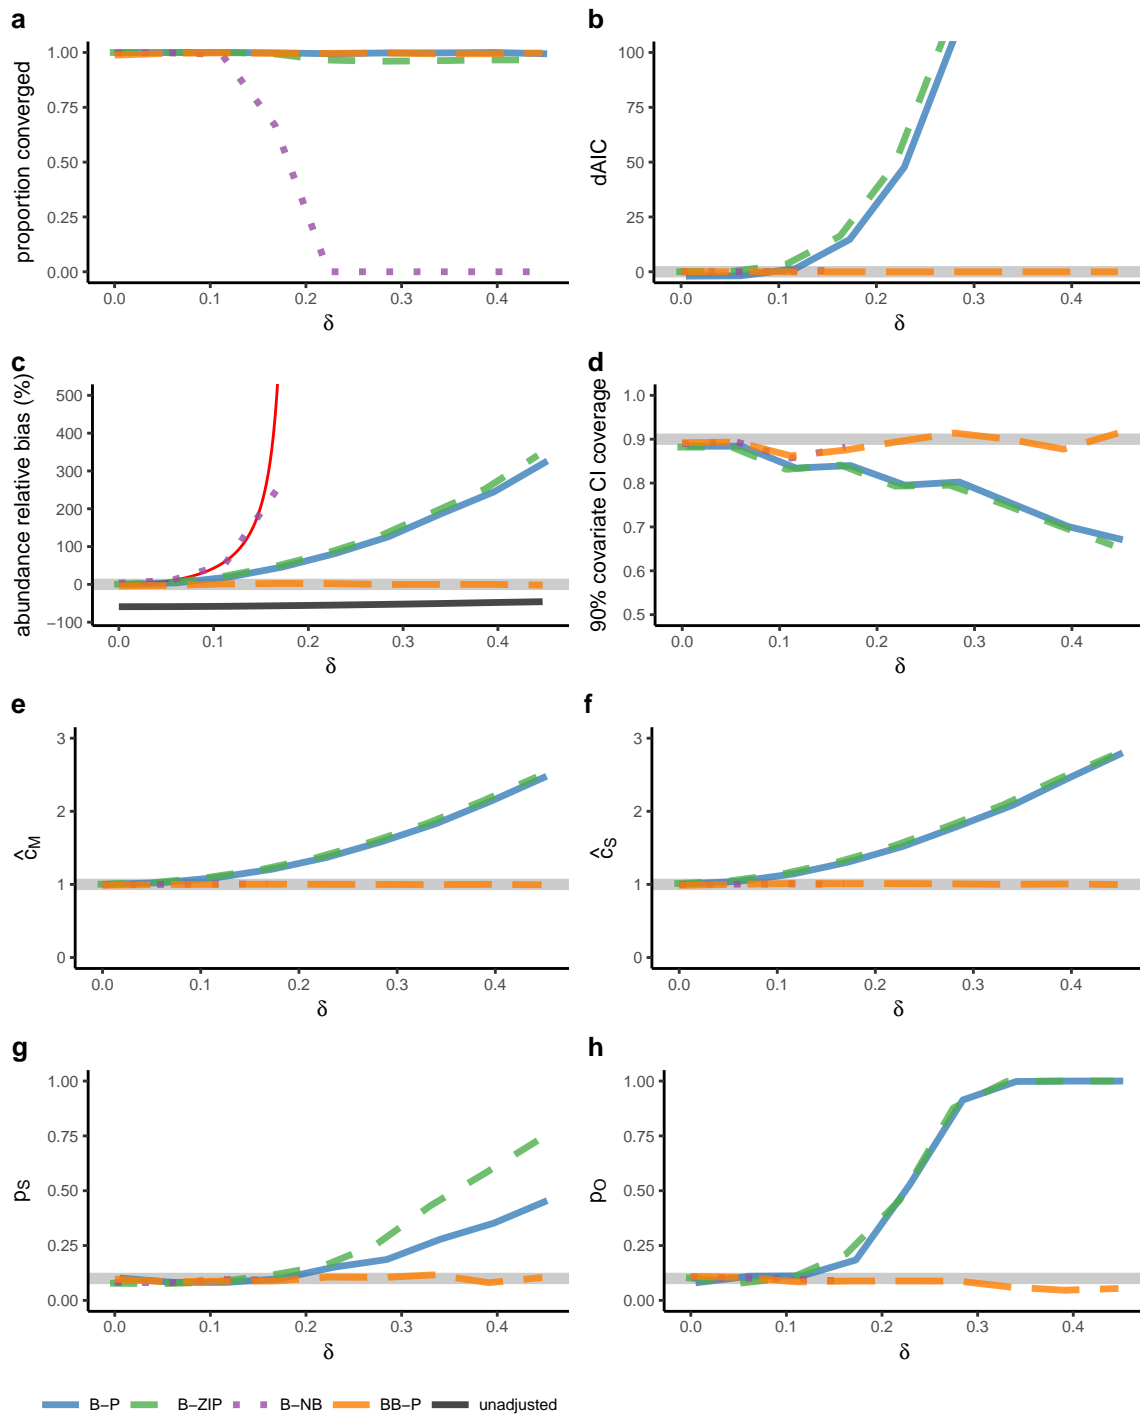

Figure 5: Results for binomial Poisson (B-P, blue), binomial ZIP (B-ZIP, green), binomial NB (B-NB, magenta), and beta-binomial Poisson (BB-P, orange) models fitted to data simulated from a Poisson mixture with beta-binomial detection (scenario 2) as a function of the amount of variation in detection probability  $\delta$ . Grey lines give the reference level in each panel. a) Proportion of simulations for which estimates were stable relative to the numerical cutoff  $K$  and for which the optimization routine converged. b) Average difference in AIC between each model and the fitted true BB-P model. c) Relative bias in estimated mean abundance. Black line gives estimates not adjusted for imperfect detection, computed as the mean of the maximum counts at each site. The red line gives the theoretical bias of the B-NB model by matching moments. d) Proportion of Wald confidence intervals (90%) for the covariate effect that cover the true value (0). e) Marginal overdispersion measure. f) Site-sum overdispersion measure. g) Proportion of simulations for which a normality test (Shapiro) computed from site-sum residuals was rejected at the 10% level. h) Proportion of simulations for which a normality test (Shapiro) computed observation residuals was rejected at the 10% level.

#### 335 **2.4.4 Simulation results: scenario 2**

336 Most model fits in scenario 2 converged and were stable with respect to  $K$ , except under the B-NB model  
337 that failed for almost all simulated data sets when  $\delta > 0.2$  (Fig. 5a). Properties of the model fits like bias,  
338 coverage etc. were computed only from fits that converged and were stable with respect to  $K$ .

339 The B-NB model, when it converged, strongly overestimated abundance even for small amounts of variation  
340 in the detection probability, while the B-P and B-ZIP models strongly overestimated abundance when the  
341 variation in detection probability was larger (Fig. 5c). The correct beta-binomial Poisson model (BB-P)  
342 provided unbiased estimates. Confidence intervals for the spurious covariate had acceptable coverage for  
343 moderate variation in the detection probability but declined as that variability increased except under the  
344 correct model (Fig. 5d).

345 The overdispersion measures  $\hat{c}_M$  and  $\hat{c}_S$  performed similarly in detecting lack of fit. They were unable to  
346 indicate lack of fit of the strongly biased B-NB model but did increase for the B-P and B-ZIP models as  
347 the variation in the detection probability increased (Fig. 5e and f). However, even when abundance was  
348 estimated at twice its true value (100% relative bias) under these models, the overdispersion measures were  
349 only around 1.5. These metrics therefore struggled to indicate lack of fit, and overdispersion metrics only  
350 slightly larger than 1 could correspond to very strong bias in estimated abundance.

351 Normality tests of rq residuals similarly failed to detect lack of fit for small to moderate variation in the  
352 detection probability. For large variation in the detection probability the test of the observation rq residuals  
353 did often detect lack of fit and had better power than the test of the marginal rq residuals (Fig. 5g and h).

354 AIC had better performance in determining relative lack of fit of the B-P and B-ZIP model in relation to the  
355 true BB-P model, but was unable to distinguish between the B-NB model and the true model (Fig 5b).

#### 356 **2.4.5 Approximating the BB-P N-mixture model with a B-NB model**

357 The inability of the overdispersion measures to diagnose lack of fit of the B-NB model in scenario 2, the  
358 small difference in AIC between this model and the true BB-P model for moderate values of  $\delta$ , and the  
359 collapse at large values of  $\delta$ , can be understood through approximating the BB-P model with a B-NB model.  
360 Barker *et al.* (2017) recently used moment matching to show that Poisson and negative binomial N-mixture  
361 models with a binomial detection model can be approximated by a double Poisson regression model, the  
362 latter lacking any notion of a latent abundance. Using moment matching, we show in Appendix 1 that an  
363 N-mixture model with beta-binomial detection and a Poisson abundance mixture can be approximated by

364 another N-mixture model with binomial detection and a negative binomial abundance mixture where the  
365 abundance is inflated as long as  $\delta^2 < p/(\lambda - \lambda p)$ . In other words, data from a BB-P model will look identical  
366 to data from a B-NB model with higher abundance in terms of means, variances and covariances for such  
367 values. Because of this it is difficult to distinguish between overdispersion in the detection probability and  
368 overdispersion in abundance. The only chance to separate between them is therefore to resort to more subtle  
369 properties of the models given by their higher order moments.

370 This explains why the overdispersion measures  $\hat{c}_M$  and  $\hat{c}_S$  cannot detect lack of fit in scenario 2 since they only  
371 depend on the first and second order moments of the models. It also gives a justification for the breakdown  
372 of the B-NB model around  $\delta = 0.2$  in Fig. 5. The moment matching gives negative  $p$  for the B-NB model if  
373  $\delta > 0.18$ . For these values of  $\delta$ , the best moment approximation is therefore  $p = 0$  and  $\lambda = \infty$ . For values of  
374  $\delta < 0.18$  the expected bias from the B-NB moment approximation matches the bias in the simulations (Fig.  
375 5c).

376 The above approximation also suggests that the BB-P model could underestimate abundance and provide a  
377 decent fit to data that are generated from a B-NB model with the same moments as long as  $\delta^2 < p/(\lambda - \lambda p)$ .  
378 For larger values of  $\delta$  there is no matching B-NB model but we show in Appendix 1 that for such  $\delta$  there is a  
379 range of BB-NB N-mixture models with the exact same moments as the BB-P model. This range contains one  
380 model for each possible value of abundance larger than  $\lambda$ . Hence, data that have first and second moments  
381 that matches the BB-P model could have been generated from a model with overdispersion in both abundance  
382 and detection with a much higher abundance than the BB-P model would suggest.

### 383 **3 Discussion**

384 N-mixture models provide an appealing framework for learning about absolute rather than relative abundance  
385 of populations from count data alone, but this comes at the price of a very strong reliance on model  
386 assumptions. Count data by themselves contain only minimal information about absolute abundances (Knappe  
387 & Korner-Nievergelt 2015; Barker *et al.* 2017) and our results, and some results of previous studies (Martin  
388 *et al.* 2011; Toribio *et al.* 2012), show that this leads to N-mixture models often being sensitive to even  
389 small amounts of model mis-specification. As a result, estimates of abundance and detection can be severely  
390 biased and inference about effects of covariates misleading if model assumptions are not met to a satisfactory  
391 degree. In light of this, finding a model that adequately fits the data is necessary for reliable inferences about  
392 abundance using N-mixture models. The diagnostic tools proposed here are designed to evaluate the goodness  
393 of fit of N-mixture models.

394 Our results show sensitivity of estimated abundances to overdispersion in the abundance mixture and, as  
395 previously shown (Martin *et al.* 2011), in the detection probability if the overdispersion is not accounted  
396 for. Not accounting for overdispersion in the abundance mixture leads to underestimating actual abundance  
397 while not accounting for random variation in the detection probability leads to overestimating abundance.  
398 In our simulations, site-sum  $r_q$  residuals and marginal and site-sum overdispersion measures were effective  
399 in detecting lack of fit caused by overdispersion in the abundance mixture. However, average values of the  
400 overdispersion metrics as small as 2 or less corresponded to underestimating abundance by 30% on average.  
401 We found detecting lack of fit due to overdispersion in the detection probability to be more challenging. Lack  
402 of fit of a binomial detection model due to random variation in the detection probability among sites and  
403 visits was only reliably detected at levels of overdispersion where bias was already large.  $R_q$  residuals and  
404 overdispersion metrics had no power to detect lack of fit of the negative binomial model even when abundance  
405 was overestimated by over 300%, but had some power to detect lack of fit of the binomial Poisson and ZIP  
406 models for high variability in the detection probability. Like for lack of fit due to overdispersion in abundance,  
407 small values of the overdispersion metrics can correspond to strong bias in estimated abundance.

408 Problems with detecting lack of fit due to variation in the detection probability occur despite the fact that we  
409 used a large sample size of 200 sites and 5 repeat visits in our simulation, and are not simply due to a poor  
410 choice of goodness of fit metrics. The problems arise due to a fundamental similarity between alternative  
411 model structures for the same data leading to difficulties in distinguishing between models. We show in  
412 Appendix 1 that the first and second order moments of the negative binomial N-mixture model can be matched  
413 exactly to the moments of a beta-binomial Poisson N-mixture model for small to intermediate variability  
414 in the probability of detection. This correspondence explains why detecting lack of fit is problematic for  
415 this model since higher order moments are needed to separate between them. That is, data from a negative  
416 binomial model and a beta-binomial Poisson model can behave in much the same way and are therefore  
417 difficult to separate. While it is possible that alternative goodness of fit metrics that are more efficient in  
418 detecting lack of fit due to variation in the detection probability could be designed, this will be a hard and  
419 sometimes impossible problem to solve, especially for limited sample sizes such as a low number of repeat  
420 visits.

421 Barker *et al.* (2017) recently used moment matching to show that alternative data generating mechanisms  
422 can give rise to data that are similar to the binomial Poisson and negative binomial N-mixture models. The  
423 moment matching here extends these results to beta-binomial models, and does so within the extended  
424 framework of beta-binomial negative binomial N-mixture models to show that a wide range of different  
425 abundances can give rise to similar data. This is concerning for the robustness of estimates of abundance using

426 the beta-binomial model. Most real data sets would be expected to contain overdispersion (or sometimes  
427 underdispersion) in both the detection and the abundance process. The beta-binomial negative binomial  
428 N-mixture model provides one framework for such data, but we have shown that this framework is identifiable  
429 only by considering moments of the models beyond those of the second order (means, variances and covariances)  
430 so that resorting to arguably subtle properties of the models would be required to identify abundance.

431 The bias of the N-mixture model under mis-specification depends on parameter values. We used a moderately  
432 low detection probability ( $p = 0.25$ ) and a high abundance ( $\lambda = 10$ ) in our simulations. The moment matching  
433 suggests that if the detection probability is higher or abundances lower, the biases will be smaller and the  
434 N-mixture model more robust. The problem in practice is that these quantities are unknown. It seems  
435 tempting to rely on estimated detection probabilities and abundances from a fitted model to determine  
436 that one is in the parameter region where estimates are robust, but it is clear from the simulations that  
437 such an approach is not reliable. In scenario 1, estimated detection probabilities under models ignoring  
438 overdispersion in abundance were much higher than the detection probabilities used to simulate the data.  
439 Our suggestion is to instead fit multiple N-mixture models with and without overdispersion to the same data.  
440 In the parameter region where the N-mixture model is more robust, the different models are expected to  
441 provide similar although not necessarily identical estimates. In cases where the different models give similar  
442 abundances and fit the data well, the estimation issues discussed here may therefore be less of a problem.

443 Variability in the detection probability led to failure of the negative binomial N-mixture model such that  
444 it provided practically infinite estimates of abundance as this variability increased. This happened in our  
445 simulations when matching the moments of the negative binomial N-mixture model to the beta-binomial  
446 model suggests a negative probability. Thus our results give a mechanism through which the negative binomial  
447 model can fail to provide finite estimates of abundance, a problem that has been commonly observed in case  
448 studies and in simulations (Dennis *et al.* 2015; Kéry & Royle 2016).

449 The goodness of fit checks discussed here for binomial N-mixture models are easily extended to multinomial  
450 N-mixture models (Kéry & Royle 2016). Site-sum  $r_q$  residuals and overdispersion metrics may for example  
451 be defined for the sum of counts over all the observed categories of the multinomial. In distance sampling  
452 this equates to the total number of individuals detected across all distances at each site, and our  $\hat{c}_S$  measure  
453 defined in this way would correspond to the  $\hat{c}$  metric for distance sampling given by Johnson *et al.* (2010) in  
454 the case of Poisson distributed abundances.

### 455 **3.1 Conclusions**

456 Some studies have questioned the utility of the N-mixture framework (Hunt *et al.* 2012; Couturier *et al.* 2013;  
457 Barker *et al.* 2017). Our results extend concerns about robustness to N-mixture models with beta-binomial  
458 detections, which have been argued to be more robust than their binomial counterparts (Martin *et al.* 2011).  
459 We agree with Barker *et al.* (2017) that count data lacking additional information about detection probabilities  
460 are often better treated as indices of relative abundance than used to estimate absolute abundance. By  
461 treating data as indices one can get around the instabilities often associated with the N-mixture model and  
462 utilize more standard frameworks like the generalized linear or additive mixed models (Link & Sauer 1997;  
463 Fewster *et al.* 2000; Knappe 2016) with their suite of methods for assessing model fit (Barker *et al.* 2017).  
464 Alternatively, detection probabilities in the binomial N-mixture model may be calibrated using additional  
465 information about detections for some or all sites, e.g. through removal (Farnsworth *et al.* 2002) or distance  
466 sampling (Johnson *et al.* 2010) protocols. If one despite the concerns with robustness uses binomial N-mixture  
467 models for estimating absolute abundance one should make sure that the final model provides a good fit  
468 to the data. Doing so will provide some steps towards reducing the risk of strongly biased estimates. Our  
469 goodness of fit checks can be used to this end and are available in an R-package `nmixgof` compatible with  
470 `unmarked`.

### 471 **Acknowledgements**

472 We thank Marc Kéry for providing valuable comments that improved the paper. JK was funded by grant  
473 621-2012-4076 from the Swedish Research Council VR and DA by grant 942-2015-287 from FORMAS.  
474 The wetland survey was funded by a grant from FORMAS to TP. FB was supported by LabEx COTE  
475 (ANR-10-LABX-45).

### 476 **References**

477 Barker, R.J., Schofield, M.R., Link, W.A. & Sauer, J.R. (2017). On the reliability of N-mixture models for  
478 count data. *Biometrics*, in press.

479 Canale, A. & Prünster, I. (2017). Robustifying Bayesian nonparametric mixtures for count data. *Biometrics*,  
480 **73**, 174–184.

481 Cohen, J.E., Xu, M. & Schuster, W.S.F. (2013). Stochastic multiplicative population growth predicts and  
482 interprets Taylor’s power law of fluctuation scaling. *Proceedings of the Royal Society B: Biological Sciences*,

483 **280.**

484 Couturier, T., Cheylan, M., Bertolero, A., Astruc, G. & Besnard, A. (2013). Estimating abundance and  
485 population trends when detection is low and highly variable: A comparison of three methods for the Hermann's  
486 tortoise. *The Journal of Wildlife Management*, **77**, 454–462.

487 Dennis, E.B., Morgan, B.J. & Ridout, M.S. (2015). Computational aspects of N-mixture models. *Biometrics*,  
488 **71**, 237–246.

489 Dorazio, R.M., Mukherjee, B., Zhang, L., Ghosh, M., Jelks, H.L. & Jordan, F. (2008). Modeling unobserved  
490 sources of heterogeneity in animal abundance using a Dirichlet process prior. *Biometrics*, **64**, 635–644.

491 Dunn, P.K. & Smyth, G.K. (1996). Randomized quantile residuals. *Journal of Computational and Graphical*  
492 *Statistics*, **5**, 236–244.

493 Farnsworth, G.L., Pollock, K.H., Nichols, J.D., Simons, T.R., Hines, J.E. & Sauer, J.R. (2002). A removal  
494 model for estimating detection probabilities from point-count surveys. *The Auk*, **119**, 414–425.

495 Fewster, R.M., Buckland, S.T., Siriwardena, G.M., Baillie, S.R. & Wilson, J.D. (2000). Analysis of population  
496 trends for farmland birds using generalized additive models. *Ecology*, **81**, 1970–1984.

497 Fiske, I. & Chandler, R. (2011). Unmarked: An R package for fitting hierarchical models of wildlife occurrence  
498 and abundance. *Journal of Statistical Software*, **43**, 1–23.

499 Hilbe, J.M. (2011). *Negative binomial regression*. Cambridge University Press.

500 Hoef, J.M. ver & Boveng, P.L. (2007). Quasi-Poisson vs. negative binomial regression: How should we  
501 model overdispersed count data? *Ecology*, **88**, 2766–2772.

502 Hunt, J.W., Weckerly, F.W. & Ott, J.R. (2012). Reliability of occupancy and binomial mixture models for  
503 estimating abundance of Golden-cheeked warblers (*Setophaga chrysoparia*). *The Auk*, **129**, 105–114.

504 Johnson, D.S., Laake, J.L. & Ver Hoef, J.M. (2010). A model-based approach for making ecological inference  
505 from distance sampling data. *Biometrics*, **66**, 310–318.

506 Joseph, L., Elkin, C., Martin, T. & Possingham, H. (2009). Modeling abundance using N-mixture models:  
507 The importance of considering ecological mechanisms. *Ecological Applications*, **19**, 631–642.

508 Kéry, M. & Royle, J.A. (2016). *Applied hierarchical modeling in ecology*. Academic Press, Boston.

509 Kéry, M., Royle, J. & Schmid, H. (2005). Modeling avian abundance from replicated counts using binomial



- 510 mixture models. *Ecological Applications*, **15**, 1450–1461.
- 511 Knape, J. (2016). Decomposing trends in Swedish bird populations using generalized additive mixed models.  
512 *Journal of Applied Ecology*, **53**, 1852–1861.
- 513 Knape, J. & Korner-Nievergelt, F. (2015). Estimates from non-replicated population surveys rely on critical  
514 assumptions. *Methods in Ecology and Evolution*, **6**, 298–306.
- 515 Knape, J. & Korner-Nievergelt, F. (2016). On assumptions behind estimates of abundance from counts at  
516 multiple sites. *Methods in Ecology and Evolution*, **7**, 206–209.
- 517 Lindén, A. & Mäntyniemi, S. (2011). Using the negative binomial distribution to model overdispersion in  
518 ecological count data. *Ecology*, **92**, 1414–1421.
- 519 Link, W.A. & Sauer, J.R. (1997). Estimation of population trajectories from count data. *Biometrics*, **53**,  
520 488–497.
- 521 Lyons, J.E., Royle, J.A., Thomas, S.M., Elliott-Smith, E., Evenson, J.R., Kelly, E.G., Milner, R.L., Nyse-  
522 wander, D.R. & Andres, B.A. (2012). Large-scale monitoring of shorebird populations using count data and  
523 N-mixture models: Black Oystercatcher (*Haematopus bachmani*) surveys by land and sea. *The Auk*, **129**,  
524 645–652.
- 525 Martin, J., Royle, J.A., Mackenzie, D.I., Edwards, H.H., Kéry, M. & Gardner, B. (2011). Accounting for  
526 non-independent detection when estimating abundance of organisms with a Bayesian approach. *Methods in*  
527 *Ecology and Evolution*, **2**, 595–601.
- 528 Richards, S.A. (2008). Dealing with overdispersed count data in applied ecology. *Journal of Applied Ecology*,  
529 **45**, 218–227.
- 530 Royle, J.A. (2004). N-mixture models for estimating population size from spatially replicated counts.  
531 *Biometrics*, **60**, 108–115.
- 532 Royle, J.A. & Dorazio, R.M. (2006). Hierarchical models of animal abundance and occurrence. *Journal of*  
533 *Agricultural, Biological, and Environmental Statistics*, **11**, 249–263.
- 534 Toribio, S.G., Gray, B.R. & Liang, S. (2012). An evaluation of the Bayesian approach to fitting the N-mixture  
535 model for use with pseudo-replicated count data. *Journal of Statistical Computation and Simulation*, **82**,  
536 1135–1143.
- 537 Veech, J.A., Ott, J.R. & Troy, J.R. (2016). Intrinsic heterogeneity in detection probability and its effect on

538 N-mixture models. *Methods in Ecology and Evolution*, **7**, 1019–1028.

539 Warton, D.I., Lyonsy, M., Stoklosa, J. & Ives, A.R. (2016). Three points to consider when choosing a LM or  
540 GLM test for count data. *Methods in Ecology and Evolution*, **7**, 882–890.

541 Warton, D.I., Stoklosa, J., Guillera-Aroita, G., MacKenzie, D.I. & Welsh, A.H. (2017). Graphical diagnostics  
542 for occupancy models with imperfect detection. *Methods in Ecology and Evolution*, **8**, 408–419.
